# Supplementary material for: Swelling-resistant microgel-reinforced hydrogel polymer electrolytes for flexible all-in-one supercapacitors with high performances
Source: Royal Society of Chemistry journal article supplement (doi:10.1039/d3tc00160a), 2023-01-01
Supplement: d3tc00160a1.pdf [file d3tc00160a1.pdf]

## Supporting Information

### Swelling-resistant microgel-reinforced hydrogel polymer electrolytes for flexible all-in-one supercapacitors with high performances

Jia Yang, <sup>#a</sup> Mingxin Guo, <sup>#a</sup> Lanlan Feng,<sup>a</sup> Jiajia Hao,<sup>a</sup> Yaxin Guo,<sup>a</sup> Zhipeng Li,<sup>a</sup> Shuzheng Liu,<sup>a</sup> Gang Qin,<sup>a</sup> Gengzhi Sun,<sup>c</sup> and Qiang Chen,<sup>b\*</sup>

<sup>a</sup>School of Materials Science and Engineering, Henan Polytechnic University, Jiaozuo, China, 454000.

<sup>b</sup>Wenzhou Institute, University of Chinese Academy of Sciences, Wenzhou, Zhejiang, China, 352001.

<sup>c</sup>Key Laboratory of Flexible Electronics (KLOFE) & Institute of Advanced Materials (IAM), Nanjing Tech University (NanjingTech), Nanjing, China, 211816

<sup>#</sup> Equal contribution.

\* Corresponding author: Qiang Chen, chenqiang@ucas.ac.cn

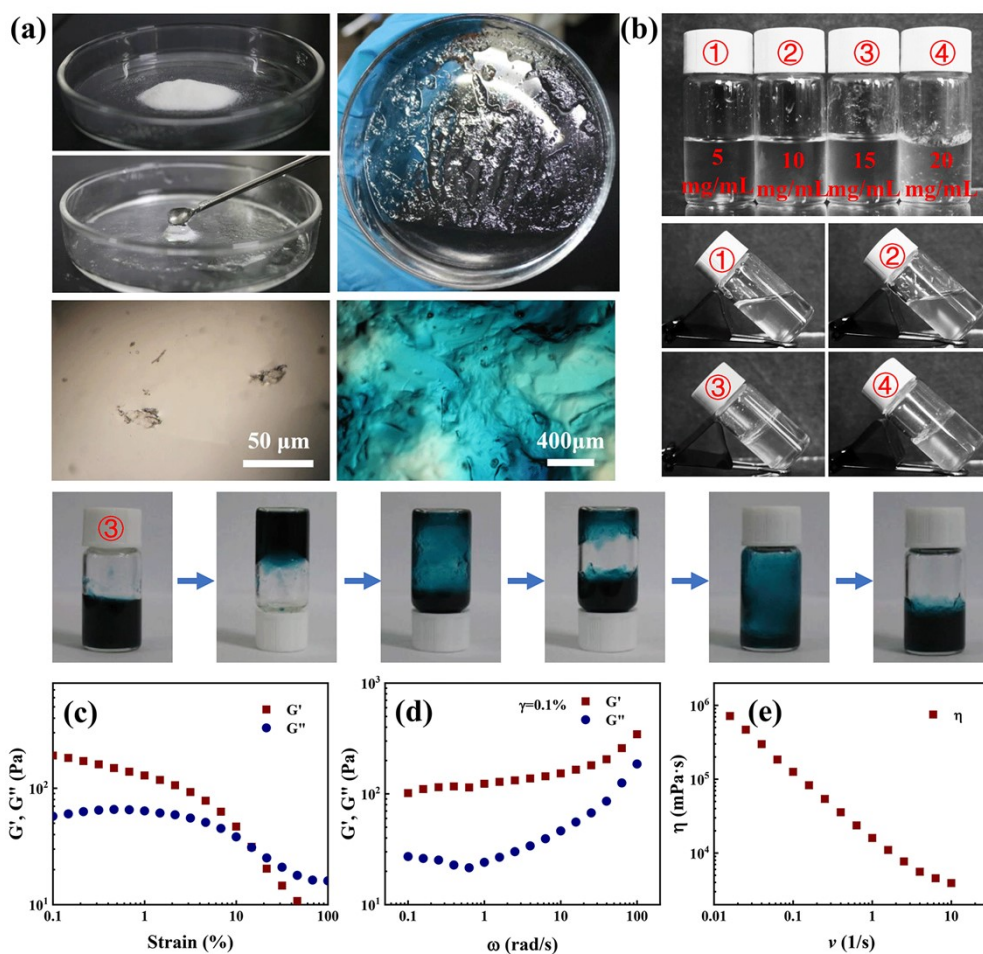

**Fig. S1** (a) PAMPS gel particles (powders) in dried state. Swollen PAMPS particles and optical photograph in AM aqueous solution before gelation. (b) Demonstration images of injectability with different PAMPS concentrations. (c) Strain sweeping measurement at a constant angular frequency of 5 rad/s. (d) Angular frequency sweeping measurement at a constant strain of 1%. (e) Flow curves obtained by shear rheology.

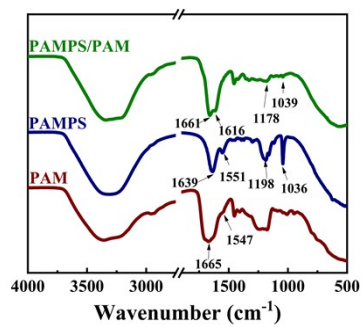

**Fig. S2** FTIR spectra of PAM, PAMPS and PAMPS/PAM gels.

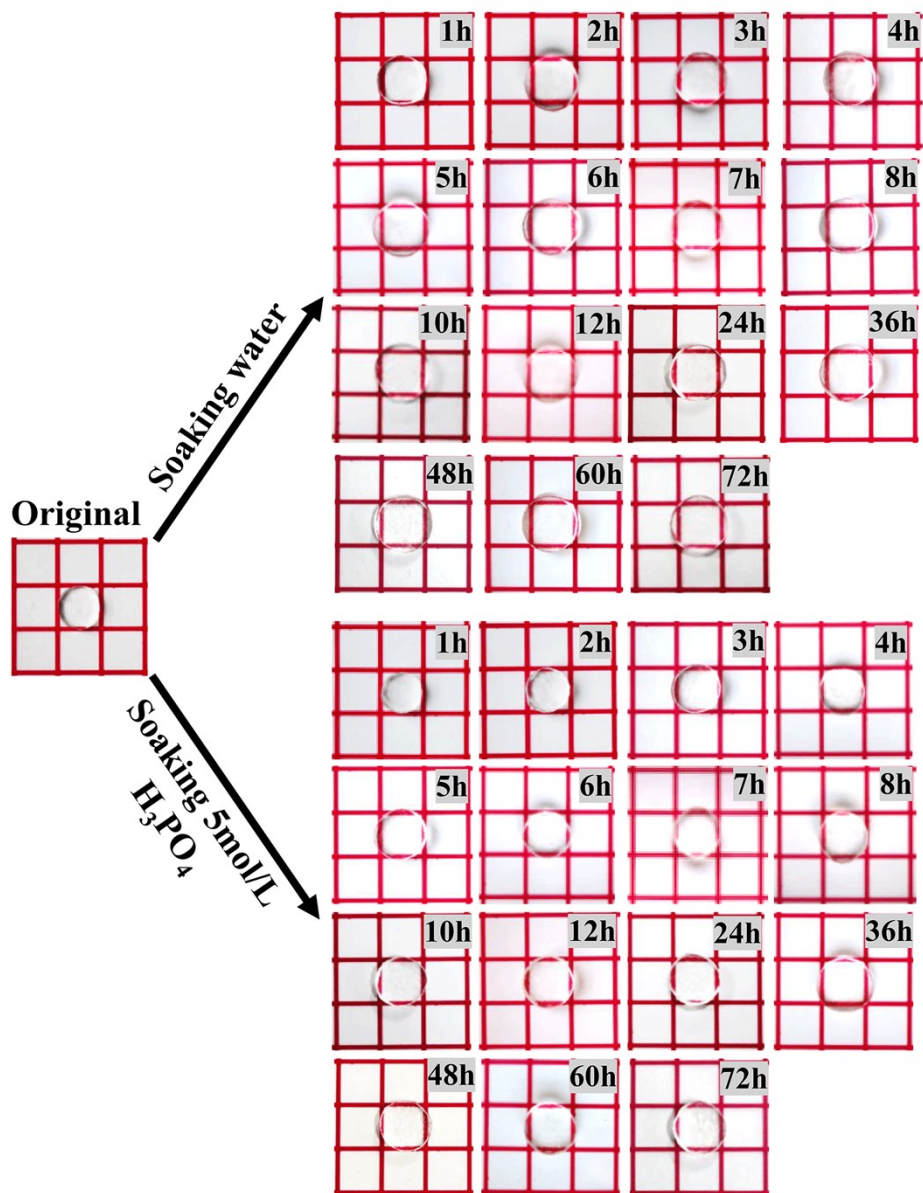

**Fig. S3** Swelling images of PAMPS/PAM MR gels soaked in water and 5 mol/L H<sub>3</sub>PO<sub>4</sub> solutions for different times.

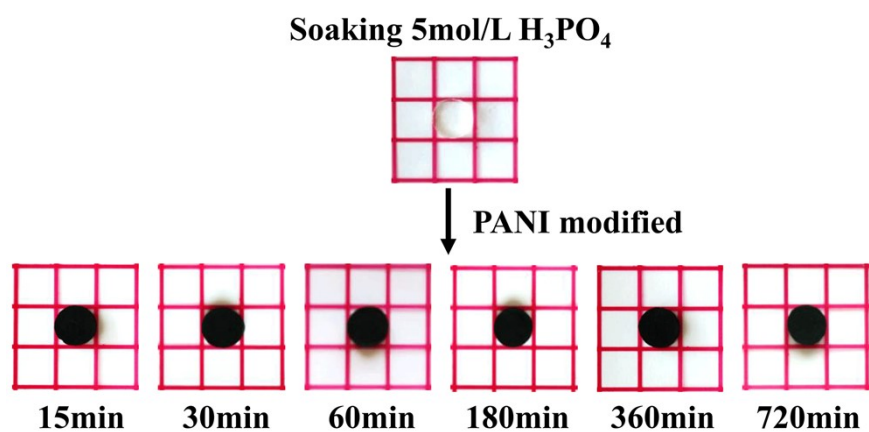

**Fig. S4** Swelling images of PAMPS/PAM-5P MR HPE in PANI environment for different times.

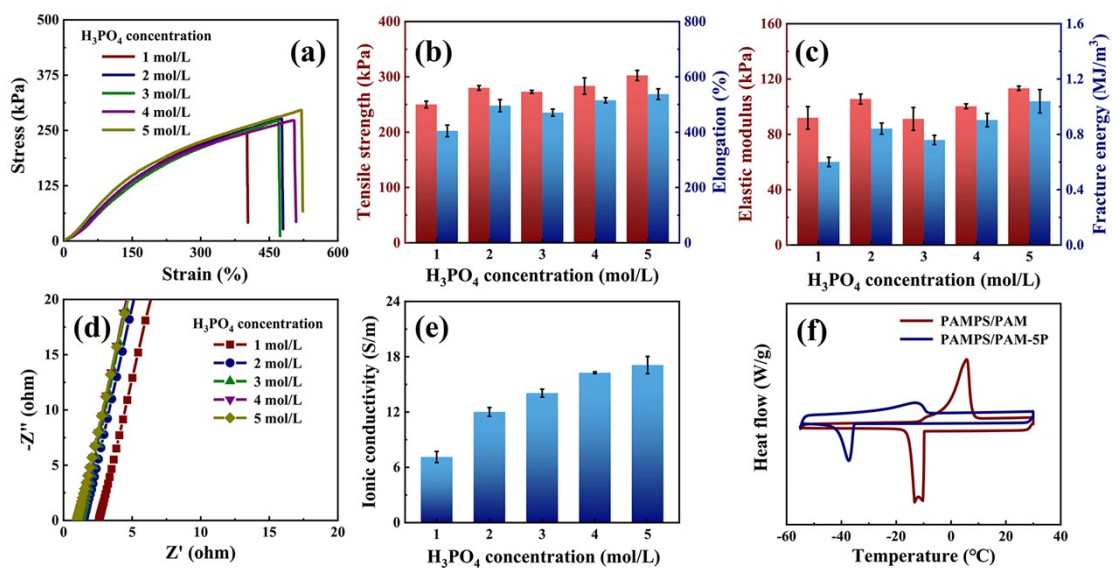

**Fig. S5** (a) Stress-strain curves, (b) Tensile strength-elongation histograms, (c) elastic modulus and fracture energy histograms, (d) EIS curves and (e) ionic conductivity of PAMPS/PAM-xP MR HPE. (f) DSC curves of PAMPS/PAM MR gels and PAMPS/PAM-5P MR HPE.

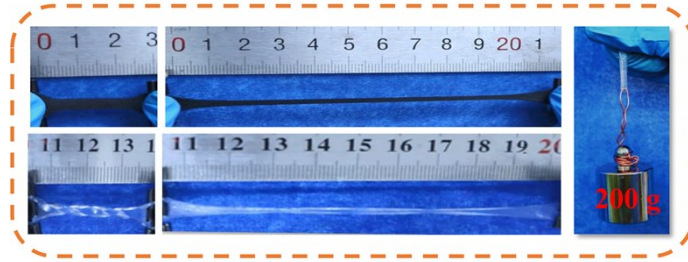

**Fig. S6** Mechanical demonstration images of PAMPS/PAM-5P MR HPE and all-in-one supercapacitor.

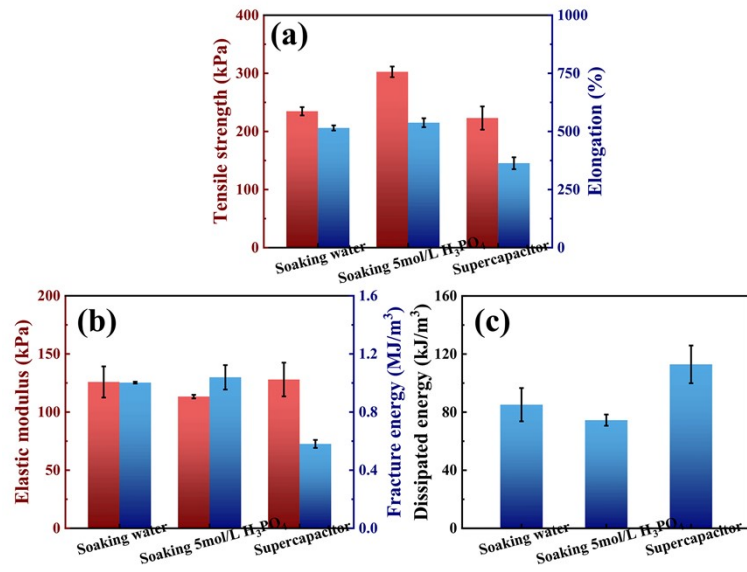

**Fig. S7** (a) Tensile strength-elongation histograms, (b) elastic modulus and fracture energy histograms and (c) dissipated energy histograms of PAMPS/PAM MR gels soaking in water, 5 mol/L H<sub>3</sub>PO<sub>4</sub> and all-in-one supercapacitors.



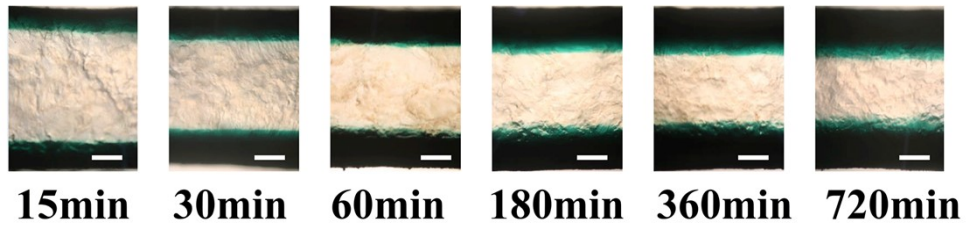

**Fig. S8** The cross-section optical photographs of flexible all-in-one supercapacitor at different polymerization time (Scale bars of 500  $\mu\text{m}$ ).

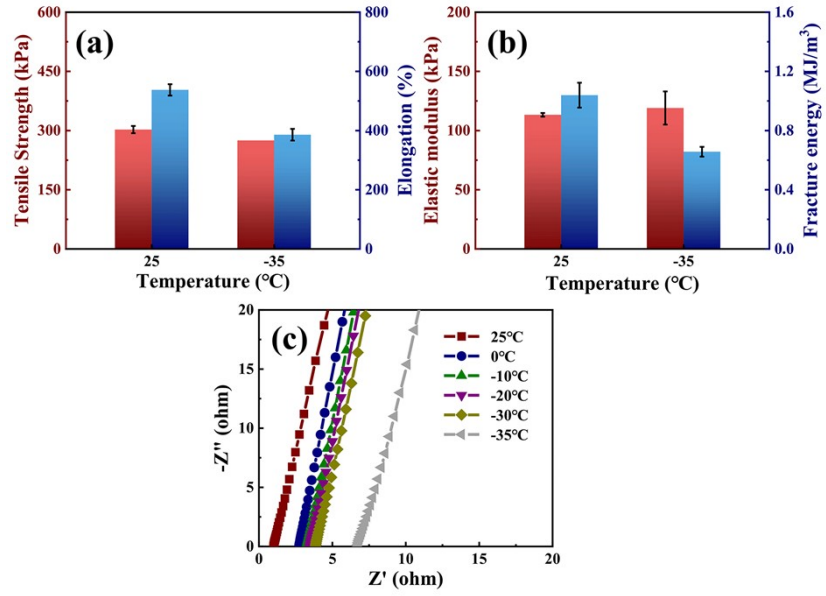

**Fig. S9** (a) Tensile strength-elongation histograms, (b) elastic modulus and fracture energy histograms and (c) EIS curves of PAMPS/PAM-5P MR HPE at low temperature.

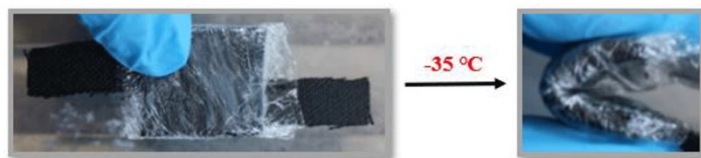

**Fig. S10** Anti-freezing demonstration of all-in-one supercapacitor.

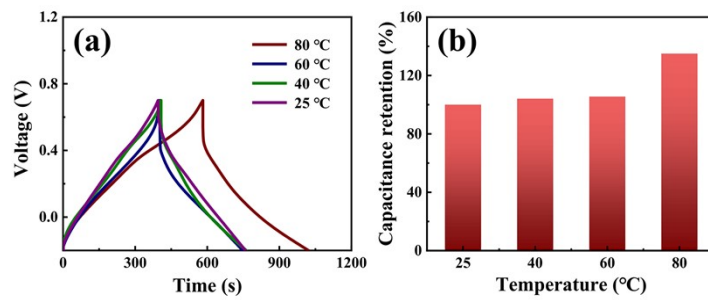

**Fig. S11** (a) GCD curves and (b) corresponding capacitance retention and coulombic efficiency of all-in-one supercapacitor at high temperature at 1.0 mA/cm<sup>2</sup>.

**Tab. S1** Comparison of reported all-in-one supercapacitors.

| Materials      | Conductive polymer concentration (mol/L) | Deposited Time | Specific capacitance (mF/cm <sup>2</sup> ) | Tensile strength (kPa) | Elongation (%) | Refs          |
|----------------|------------------------------------------|----------------|--------------------------------------------|------------------------|----------------|---------------|
| PANI/PAMPS/PAM | 0.5                                      | 1 h            | 441<br>(1.0 mA/cm <sup>2</sup> )           | 234                    | 375            | This work     |
| PANI/PVA/PHEA  | 2                                        | 4 min          | 98<br>(0.2 mA/cm <sup>2</sup> )            | 1070                   | 1467           | <sup>22</sup> |
| PANI/PAM/KC    | 0.5                                      | 15 min         | 219<br>(1.0 mA/cm <sup>2</sup> )           | 225                    | 1040           | <sup>23</sup> |
| PANI/GO-GELE   | No data                                  | 0.5 h          | 223<br>(0.2 mA/cm <sup>2</sup> )           | 200                    | 2600           | <sup>35</sup> |
| PANI/PVA       | No data                                  | 8 h            | 297<br>(0.5 mA/cm <sup>2</sup> )           | No data                | No data        | <sup>32</sup> |
| PPy/PVA        | 0.6                                      | 8 h            | 224<br>(0.8 mA/cm <sup>2</sup> )           | No data                | No data        | <sup>34</sup> |
| PPy/EG-PME     | 0.6                                      | 9 h            | 212<br>(0.8 mA/cm <sup>2</sup> )           | No data                | No data        | <sup>36</sup> |
| PANI/APH       | 0.5                                      | 10 h           | 26<br>(0.05 mA/cm <sup>2</sup> )           | 300                    | 300            | <sup>31</sup> |
| PANI/AF-OPH    | 0.17                                     | 12 h           | 14<br>(0.03 mA/cm <sup>2</sup> )           | 25                     | 350            | <sup>33</sup> |
| PPy/PVA        | No data                                  | 12 h           | 59<br>(0.2 mA/cm <sup>2</sup> )            | 56                     | 110            | <sup>37</sup> |
